the leftward shifting of the force-velocity curve and reduction of rate of pressure development and peak pressure indicate that Ethrane evokes a negative inotropic effect upon the intrinsic contractile state of the heart. The decreased intensity of the active state may be related to the alteration of the chemical interactions of the contractile proteins. (Supported by USPHS Grant HE-01711 from the National Heart Institute.)

**Hemodynamic and Respiratory Changes during Pulmonary Lavage.** J. D. SMITH, M.B., Ch.B., J. E. MILLEN, B.S., P. SAFAR, M.D., and E. D. ROBIN, M.D., *Departments of Anesthesiology and Medicine, University of Pittsburgh School of Medicine, Pittsburgh, Penna.* Pulmonary lavage, defined as the introduction of large volumes of fluid into the tracheobronchial tree and alveoli of the degassed lung or lobe and evacuation of the fluid has been used in treating various lung disorders, particularly pulmonary alveolar proteinosis. This study describes changes in hemodynamics, intrathoracic pressure and gas exchange produced by pulmonary lavage in one patient with alveolar proteinosis and in three dogs and one calf with normal lungs. *Methods:* The technique was essentially that described by J. Ramirez-R. (Dis. Chest 50: 581, 1966) using a 39 F Carlens catheter inserted under topical anesthesia. The lavaging fluid consisted of 0.9 per cent saline solution buffered to pH 4.5 with sodium bicarbonate and containing heparin, 7.5 units/ml. The osmolality of the solution was 293 mOsm. Ventilation with 100 per cent oxygen was assisted. Central venous pressure (CVP) and arterial blood gas tensions were measured during progressive filling and emptying of the lavaged lung. The animals were anesthetized with pentobarbital. A catheter was inserted into the pulmonary artery under fluoroscopic control and a latex esophageal balloon was inserted into the midesophagus. *Results: A. Man.* Rises in CVP to maximum levels of 17, 20, and 21 cm H<sub>2</sub>O were noted with the lung full of fluid, with rapid return to control levels during emptying. During four lavages, Pa<sub>o<sub>2</sub></sub> increased significantly (mean = 244 mm Hg) over the degassed prelavage values (mean 76 mm Hg). During emptying P<sub>o<sub>2</sub></sub> dropped to

degassed, and occasionally to lower, levels. *B. Animals.* During lavage pulmonary arterial pressure rose to maximums of 26, 26, and 30 mm Hg in the three dogs; values returned to control levels during emptying (18 mm Hg). Pulmonary arterial wedge pressure changed in a parallel fashion. Intraesophageal pressures in two dogs rose by 16 and 13.5 cm H<sub>2</sub>O. Similar changes were noted in the calf. Chest x-rays taken with the lung filled with fluid showed the mediastinum acutely shifted away from the liquid-filled lung. *Summary:* Unilateral filling of the lung with liquid results in a sharp increase in intrathoracic pressure, which is reflected by increases in central venous, pulmonary arterial, pulmonary wedge, and intraesophageal pressures. Pa<sub>o<sub>2</sub></sub> is low in the degassed phase as a result of nonventilation of perfused areas. Addition of liquid leads to an increase in Pa<sub>o<sub>2</sub></sub> as pulmonary vessels become compressed and blood flow is shifted to the gas-filled lung.

**The Effect of Hexamethonium on the Catecholamine Response to Nitrous Oxide in Man.** N. TY SMITH, M.D., E. I. EGER, II, M.D., L. B. KADIS, M.D., and D. CULLEN, M.D., *Departments of Anesthesia, Stanford University Medical Center, Stanford, Calif., and University of California, San Francisco Medical Center, San Francisco, Calif.* We observed previously that the addition of nitrous oxide to halothane-oxygen anesthesia in man caused an increase in plasma norepinephrine levels, plus evidence of peripheral vasoconstriction. This phenomenon was investigated further in eight normal volunteer subjects. *Methods:* Halothane-oxygen was changed to halothane-oxygen-nitrous oxide (70 per cent) both before and after administration of 100 mg hexamethonium (C6). *Results:* The percentage changes in response to N<sub>2</sub>O before C6 vs. after C6 were: serum norepinephrine levels (30.8, -24.4); cardiac output (dye dilution) (-2.9, 23.9); stroke volume (-4.5, 10.9); heart rate (1.6, 12.2); mean arterial pressure (11.8, 31.8); total peripheral resistance (14.8, 6.4); right atrial pressure (2.2, 0.7 mm Hg); left ventricular minute work (9.0, 64.4); left ventricular stroke work (7.8, 43.4); left ventricular stroke power (5.9, 33.6); tension-time index (7.1,
